# Supplementary material for: Determination of Dicofol in Tea Using Surface-Enhanced Raman Spectroscopy Coupled Chemometrics
Source: MDPI journal article supplement (doi:10.3390/molecules28145291), 2023-07-08
Supplement: s1 [file s1]

## Supplementary Materials

# Determination of dicofol in tea using surface-enhanced Raman spectroscopy coupled chemometrics

Qian Ke <sup>1</sup>, Limei Yin <sup>1,2</sup>, Heera Jayan <sup>1</sup>, Hesham R. El-Seedi <sup>3,4</sup>, Paula L. Gómez <sup>5</sup>, Stella M. Alzamora <sup>5</sup>, Xiaobo Zou <sup>2,5</sup> and Zhiming Guo <sup>1,6\*</sup>

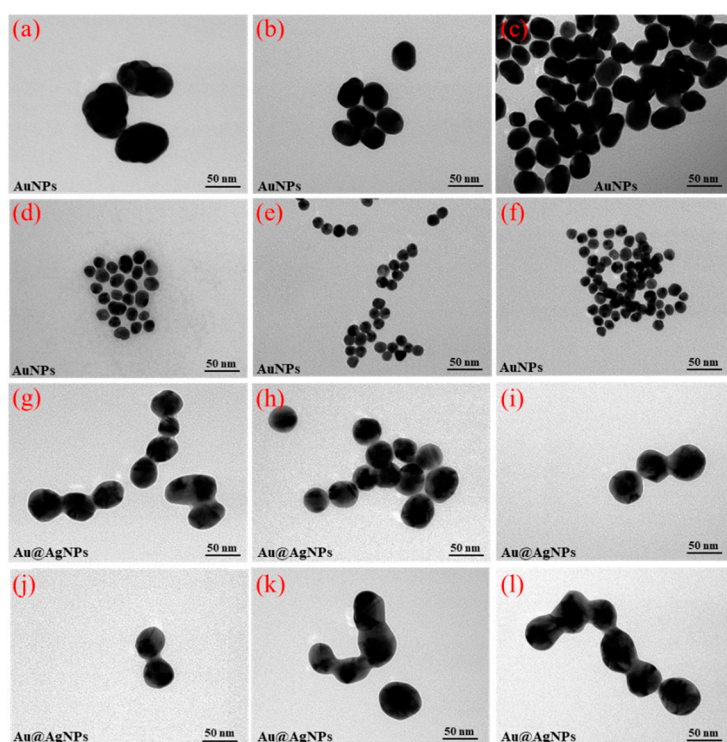

**Figure S1.** TEM images of AuNPs and core-shell Au@AgNPs. AuNPs are obtained by adding different volumes of 1% trisodium citrate (150, 200, 250, 300, 350, 400 $\mu$ L) to 425 $\mu$ L of AuCl<sub>3</sub>·HCl·4H<sub>2</sub>O (5 g/L); core-shell Au@AgNPs is obtained by adding different volumes of equal amounts of AgNO<sub>3</sub> and ascorbic acid (30, 45, 60, 75, 90, 105 $\mu$ L) to 6 ml of AuNPs (34 nm)

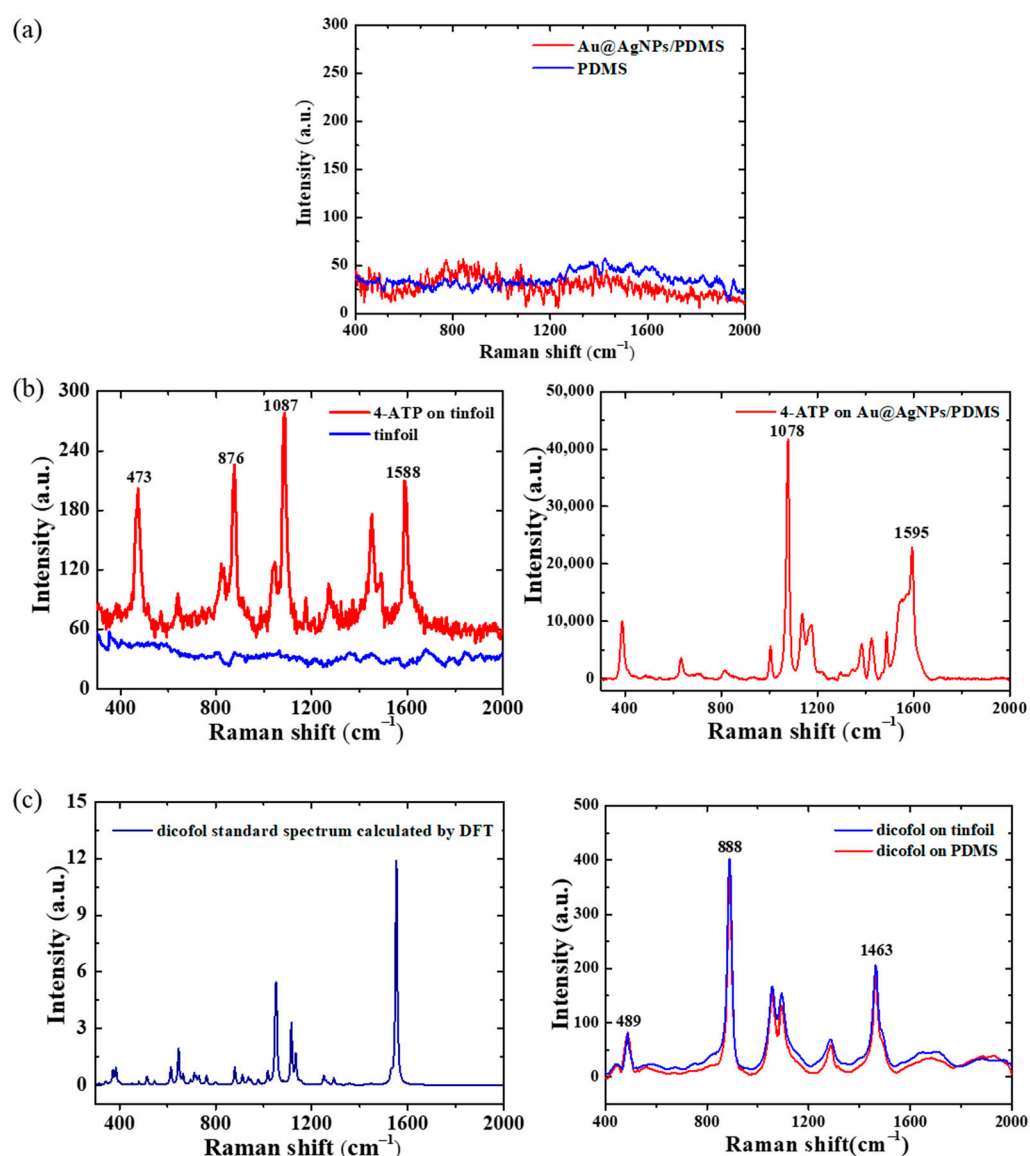

**Figure S2.** (a) Raman spectra of a blank PDMS film and a blank Au@AgNPs/PDMS substrate (b) Raman spectra of blank tin foil, 4-ATP (10<sup>-6</sup> mol/L) on tin foil and 4-ATP (10<sup>-6</sup> mol/L) on Au@AgNPs/PDMS substrate (c) standard Raman spectrum calculated by DFT of dicofol and Raman spectra of 0.1 mol/L dicofol standard solution on tin foil and on a blank PDMS film

**Table S1.** Vibrational wavenumbers and assignments of dicofol

| Experiment shift<br>(cm <sup>-1</sup> ) | Calculated shift<br>(cm <sup>-1</sup> ) | Assignments                                  |
|-----------------------------------------|-----------------------------------------|----------------------------------------------|
| 489                                     | 481                                     | C-C out of plane rock                        |
| 619                                     | 614                                     | C-H in plane wag                             |
| 709                                     | 710                                     | C-C out of plane rock                        |
| 888                                     | 880                                     | C-Cl out of plane wag/ C-C out of plane rock |
| 1055                                    | 1053                                    | C-Cl stretch/ C-C stretch                    |
| 1094                                    | 1091                                    | C-C stretch /C-H in plane wag                |
| 1261                                    | 1260                                    | C-C stretch/ C-H in plane wag                |
| 1463                                    | 1447                                    | C-C stretch/ C-H in plane wag                |

**Table S2.** Statistical performance results of dicofol detection by PLS model based on four different variable selection methods

| Model    | Calibration set |        | Prediction set |        |          |
|----------|-----------------|--------|----------------|--------|----------|
|          | Rc              | RMSEC  | Rp             | RMSEP  | RPD      |
| CARS-PLS | 0.9964          | 2.9268 | 0.9956         | 3.2798 | 10.61452 |
| Si-PLS   | 0.9874          | 5.4954 | 0.9910         | 4.7065 | 7.396898 |
| SPA-PLS  | 0.9843          | 6.1216 | 0.9856         | 5.9493 | 5.851697 |
| UVE-PLS  | 0.9880          | 5.4066 | 0.9908         | 4.7112 | 7.389519 |

The content of dicofol in the sample was calculated according to Formula (S1)

$$X = \frac{\rho \times V}{m} \times 10^{-6} \quad (\text{S1})$$

X the content of dicofol in the sample (ng/kg);

$\rho$  the concentration of dicofol in the sample solution calculated from the standard curve ( $\mu\text{g/mL}$ );

V final volume (mL)

m sample weight (g)
